# Supplementary material
Source: PubMed Central journal article supplement (PMC2724118)
Supplement: 90529.2008_7.pdf [file 90529.2008_7.pdf]

1

|                                | Control  | Patient   | P-value | P-value* |
|--------------------------------|----------|-----------|---------|----------|
| Jun D RT PCR (Fig. 4)          | 1.0±3.6  | -24.0±3.0 | <0.001  | 0.010    |
| Myogenin RT PCR (Fig. 4)       | 1.0±4.2  | -21.4±3.4 | 0.003   | 0.023    |
| CKM RT PCR (Fig. 4)            | 1.0±1.4  | -5.4±1.1  | 0.008   | 0.040    |
| TNF $\alpha$ RT PCR (Fig. 1)   | 1.2±4.9  | 18.5±4.0  | 0.026   | 0.103    |
| NOS2 RT PCR (Fig. 1)           | 0.7±3.9  | 21.3±3.5  | 0.010   | 0.030    |
| TNF $\alpha$ Western (Fig. 1)  | 0.5±0.2  | 7.3±0.2   | <0.001  | <0.001   |
| TNFR1 Western (Fig. 1)         | 7.6±0.4  | 8.6±0.3   | 0.095   | 0.286    |
| Phos TNFR1 Western (Fig. 1)    | 0.1±0.1  | 9.0±0.1   | <0.001  | <0.001   |
| $\beta$ Actin Western (Fig. 1) | 6.2±0.2  | 6.2±0.2   | 0.966   | 1        |
| NOS2 Western (Fig. 3)          | 0.8±0.4  | 9.4±0.4   | <0.001  | <0.001   |
| Myosin Western (Fig. 3)        | 8.0±0.3  | 1.6±0.3   | <0.001  | <0.001   |
| CKM Western (Fig. 3)           | 11.7±0.3 | 0.3±0.2   | <0.001  | <0.001   |
| Myogenin Western (Fig. 3)      | 6.8±0.3  | 0.3±0.2   | <0.001  | <0.001   |
| Jun D Western (Fig. 3)         | 10.4±0.7 | 0.7±0.6   | <0.001  | <0.001   |
| $\beta$ Actin Western (Fig. 3) | 6.3±0.4  | 6.4±0.3   | 0.876   | 1        |

2
