# Supplementary material
Source: PubMed Central journal article supplement (PMC2724118)
Supplement: 90529.2008_8.pdf [file 90529.2008_8.pdf]

1

|                           | Control    | Patient   | P-value | P-value* |
|---------------------------|------------|-----------|---------|----------|
| MDA Confocal (Fig. S1)    | 28.3±6.5   | 72.2±3.7  | <0.001  | <0.001   |
| NOS2 Confocal (Fig. S2)   | 22.5±20.2  | 96.7±11.6 | 0.020   | 0.020    |
| Myosin Confocal (Fig. S3) | 185.2±14.8 | 44.5±8.5  | <0.001  | <0.001   |
| JunD Confocal (Fig. S6)   | 136.6±5.0  | 29.5±3.1  | <0.001  | <0.001   |
| CKM Confocal (Fig. S4)    | 132.5±8.5  | 24.6±6.0  | <0.001  | <0.001   |

2
