# Supplementary material
Source: PubMed Central journal article supplement (PMC2724118)

Supplemental Figure 1

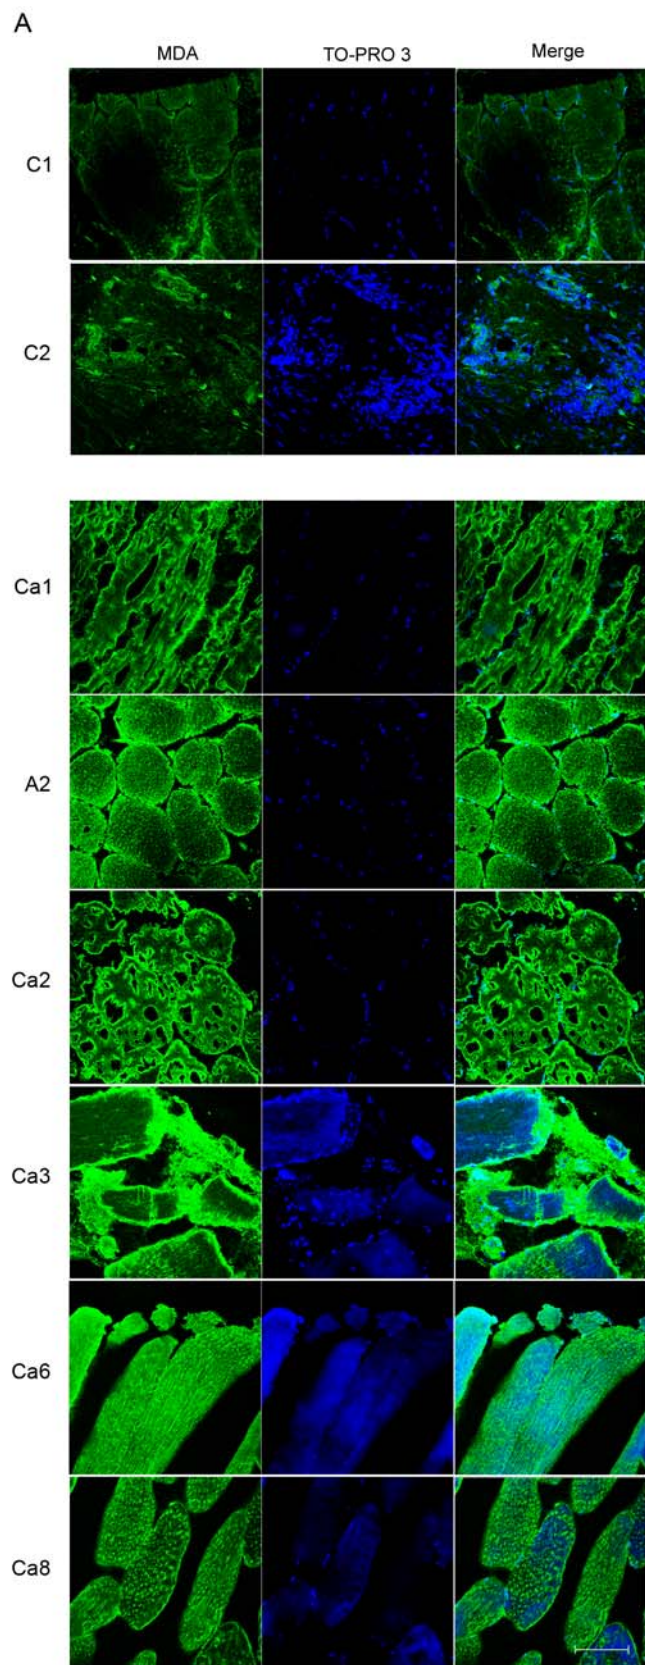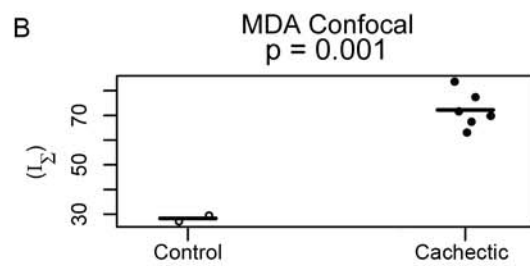

Supplement: 90529.2008_1.pdf [file 90529.2008_1.pdf]

Supplemental Figure 2

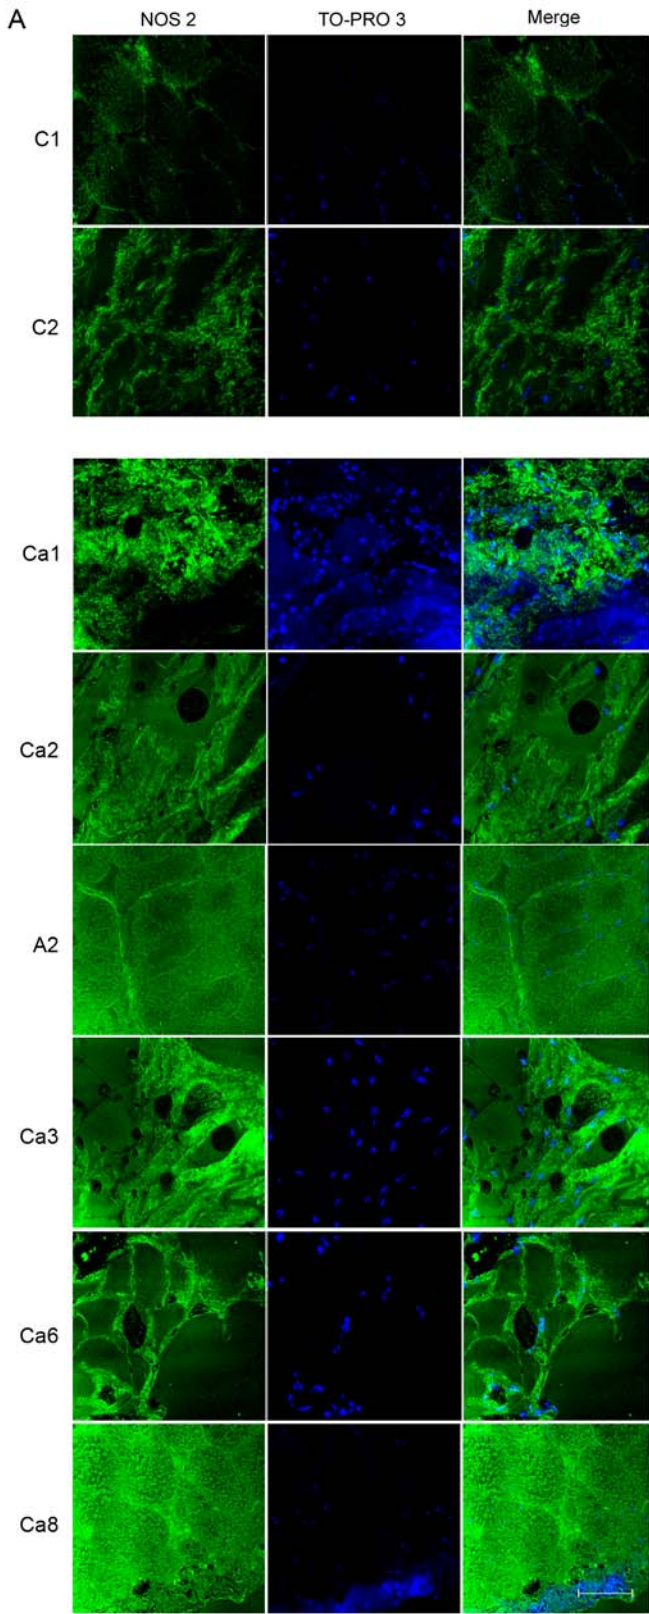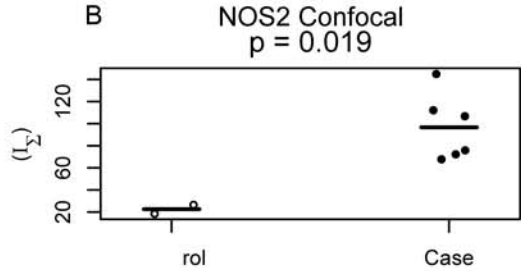

Supplement: 90529.2008_2.pdf [file 90529.2008_2.pdf]

# Supplemental Figure 3

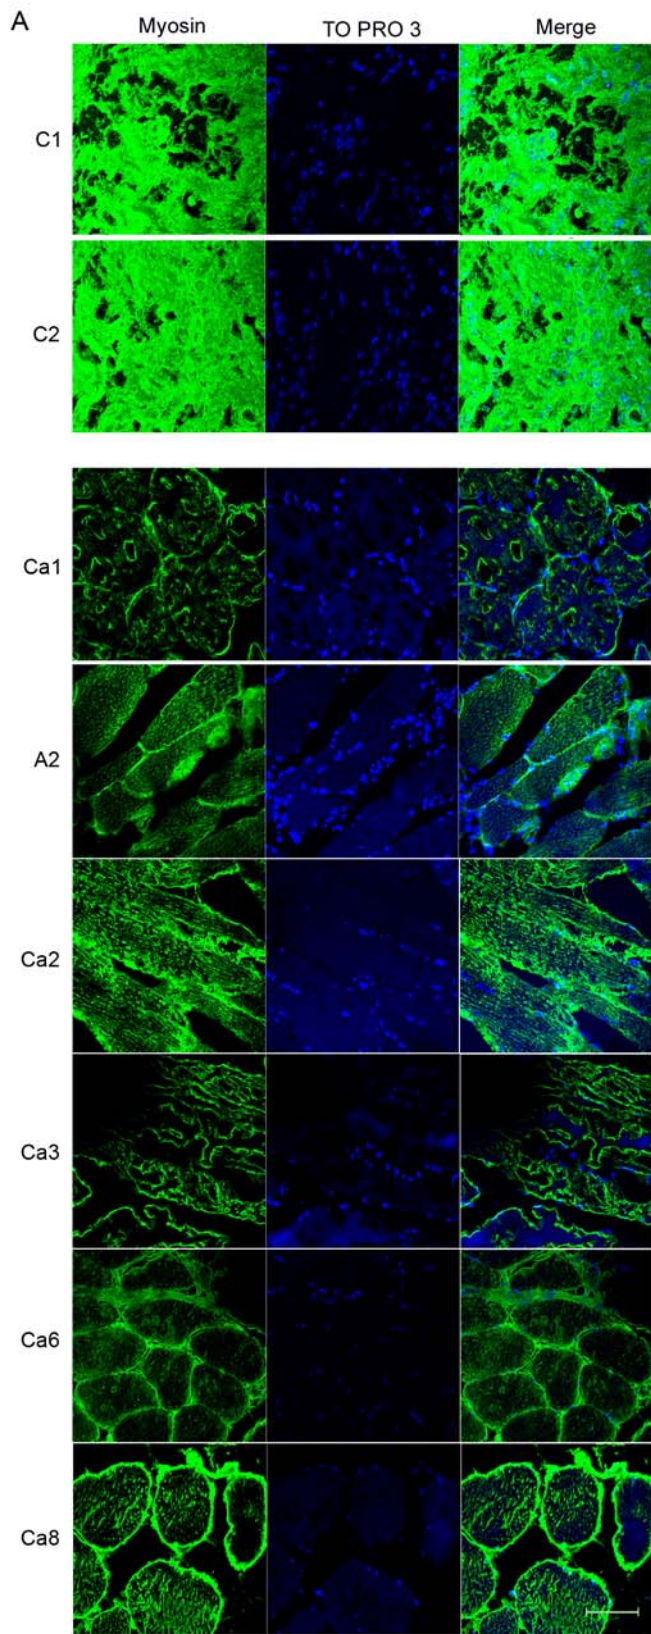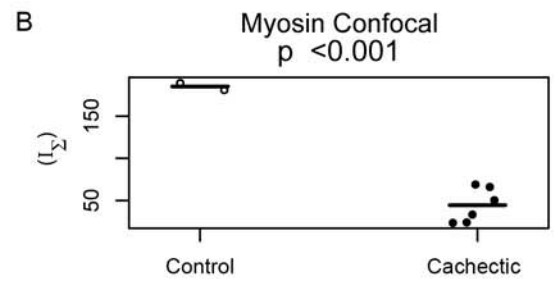

Supplement: 90529.2008_3.pdf [file 90529.2008_3.pdf]

# Supplemental Figure 4

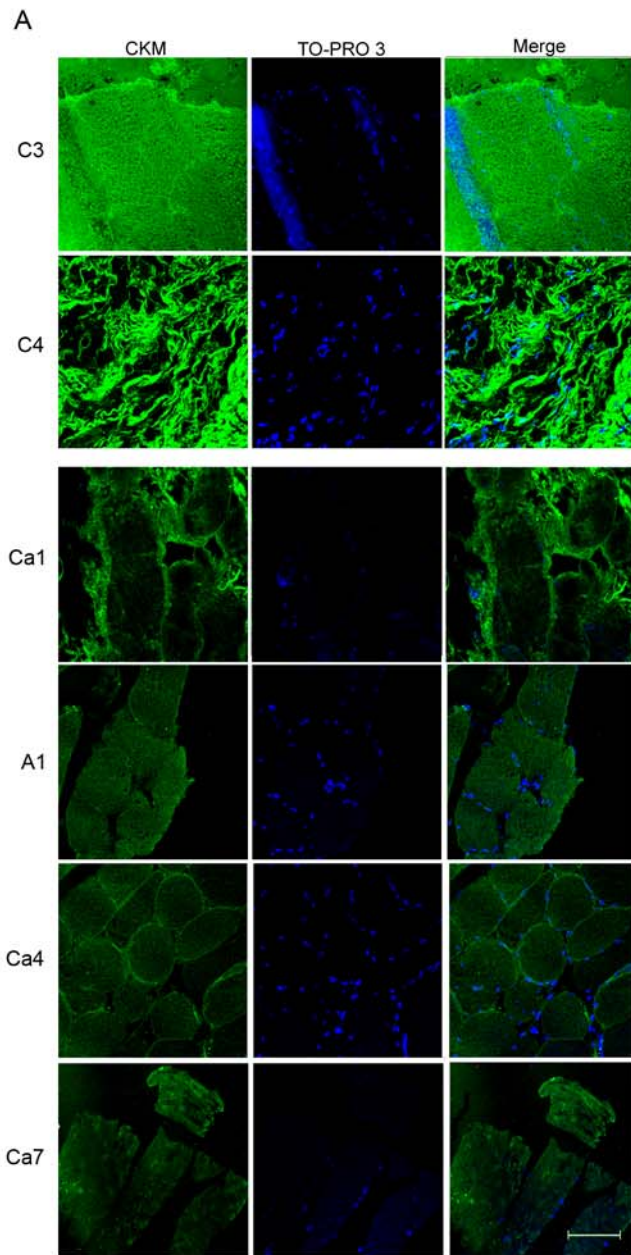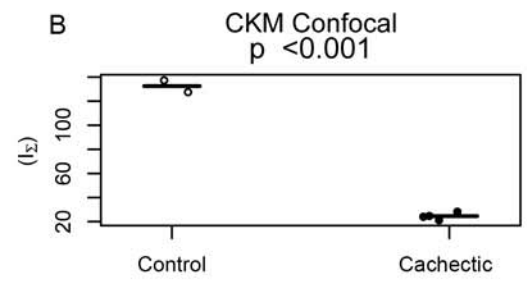

Supplement: 90529.2008_4.pdf [file 90529.2008_4.pdf]

Supplemental Figure 5

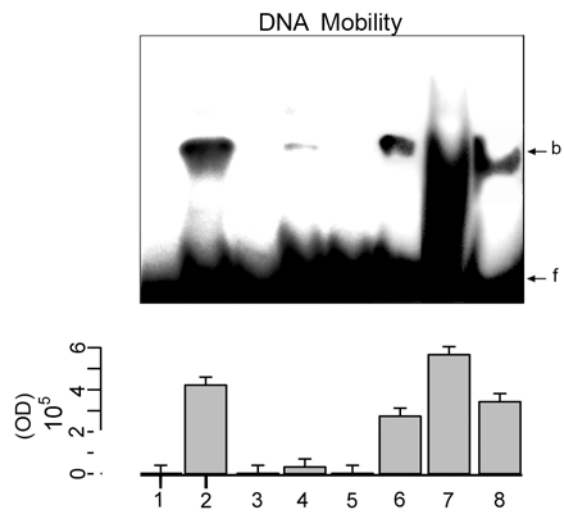

Supplement: 90529.2008_5.pdf [file 90529.2008_5.pdf]

Supplemental Figure 6

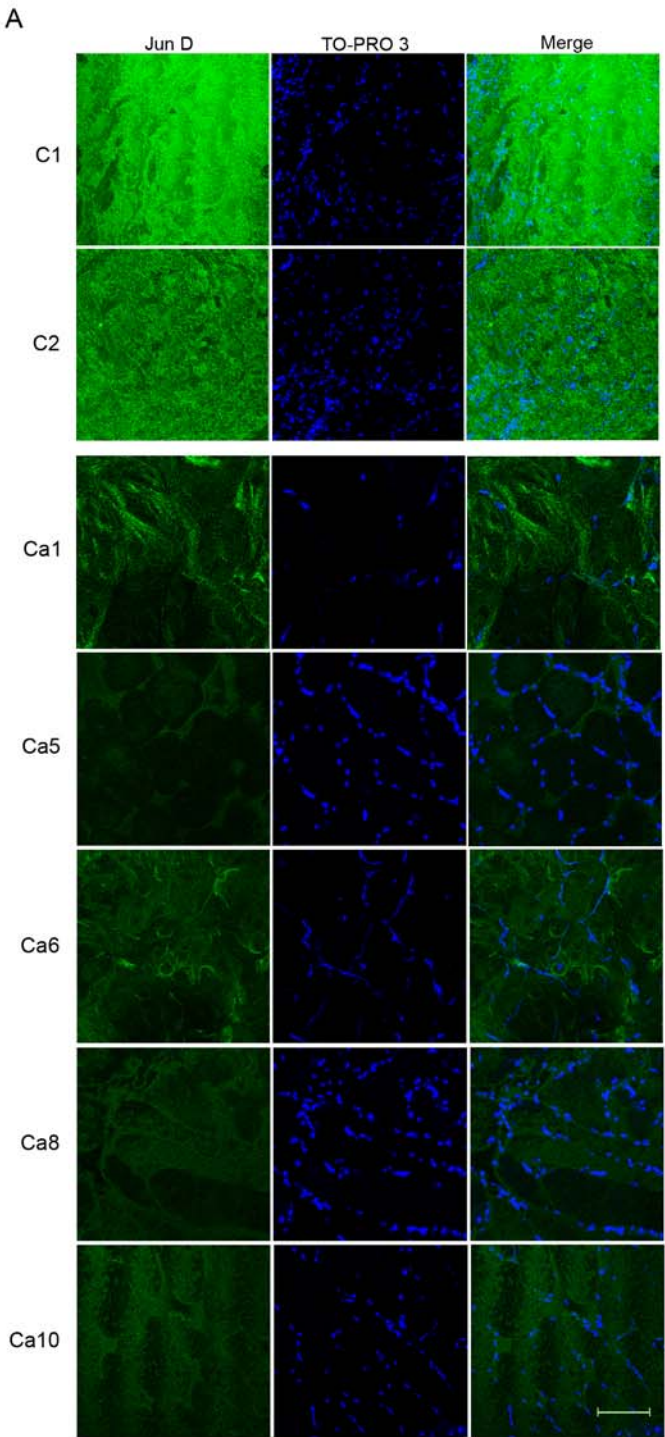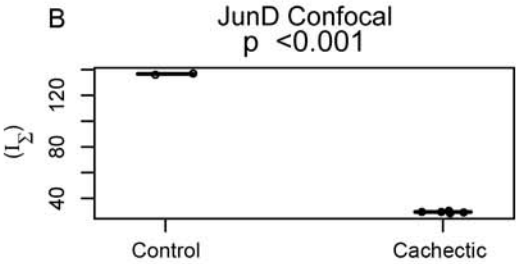

Supplement: 90529.2008_6.pdf [file 90529.2008_6.pdf]
